# Supplementary material for: Critical behavioral traits foster peer engagement in Online Mental Health Communities
Source: PubMed Central journal article supplement (PMC11729953; doi:10.1371/journal.pone.0316906), 2025-01-13

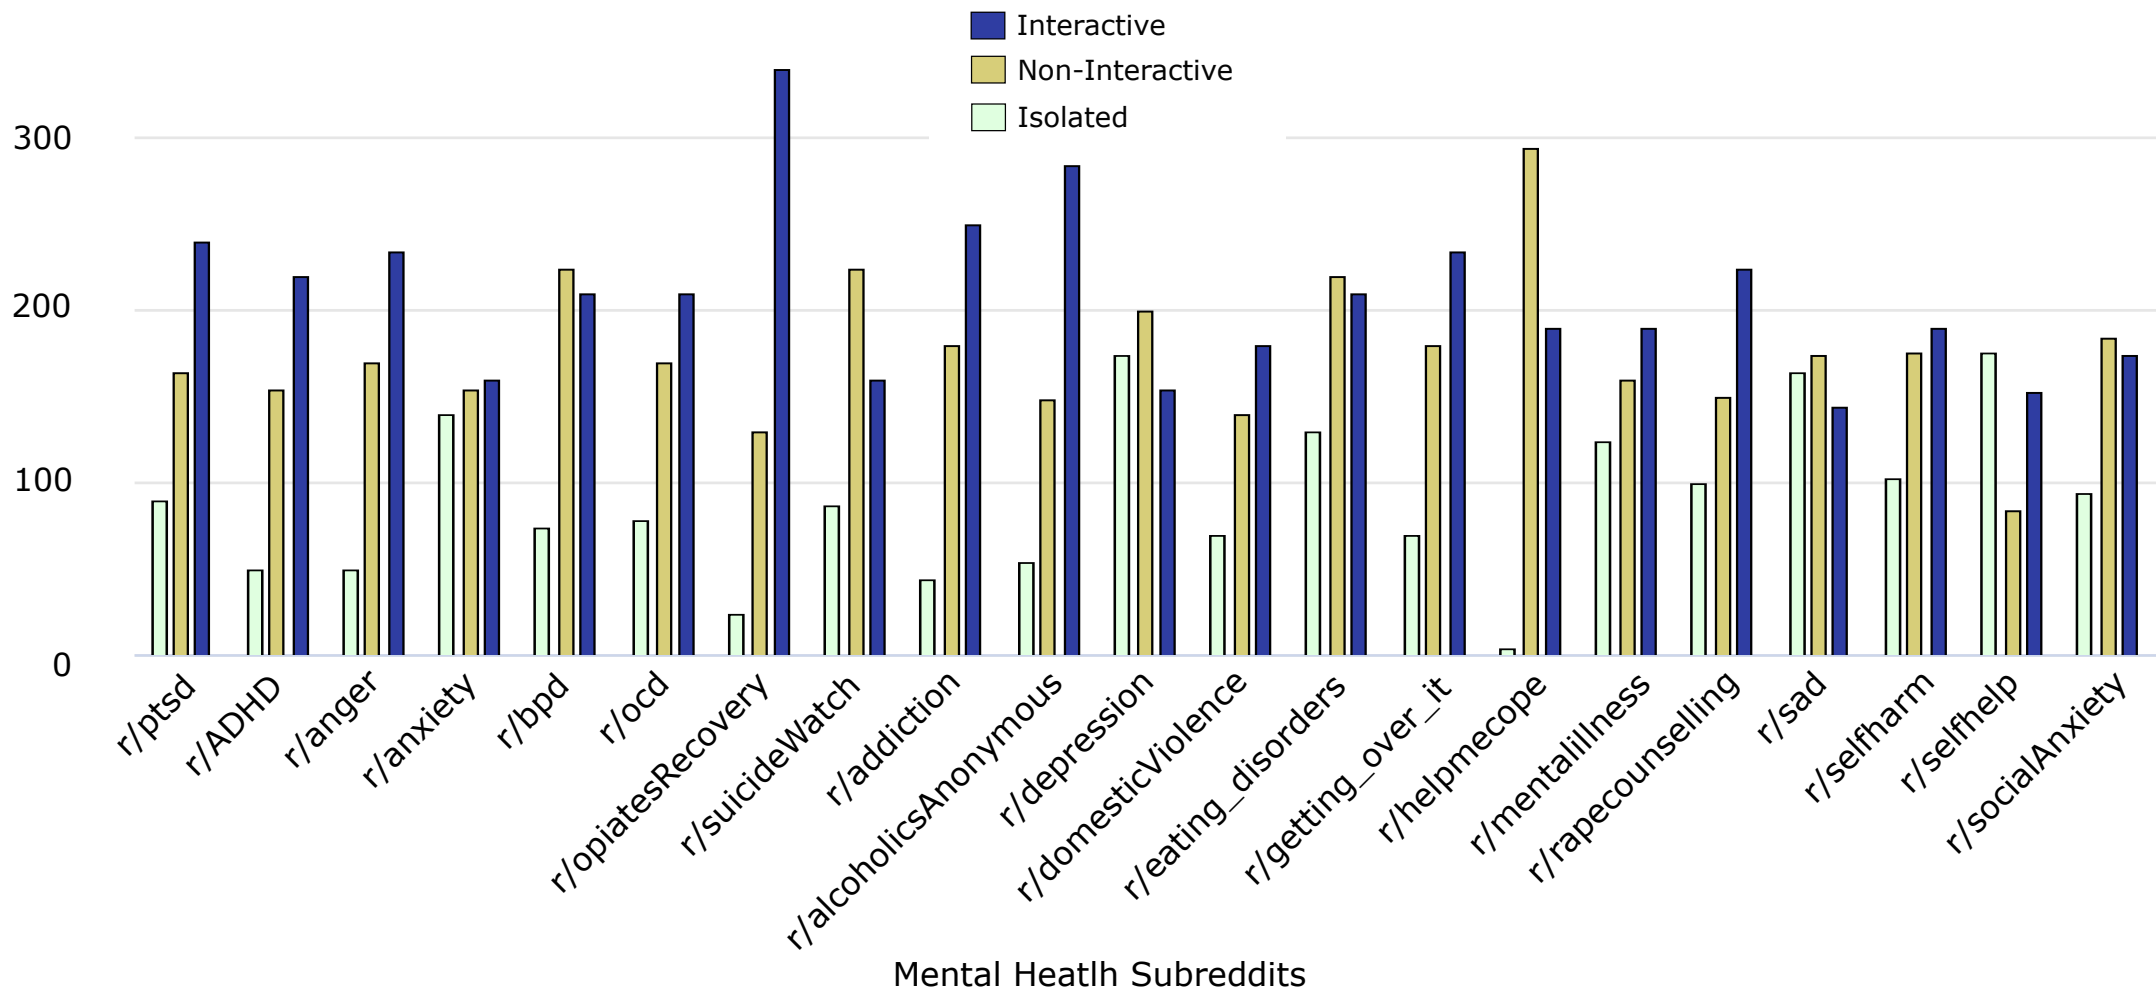

Supplement: pone.0316906.s001.pdf [file pone.0316906.s001.pdf]
